# Supplementary material
Source: publisher figshare collection journal article supplement (https://sage.figshare.com/ndownloader/files/16861595)
Supplement: Supplementary file 1 [file 16861595]

**Twitter, Incivility and 'Everyday' Gendered Othering: An Analysis of Tweets Sent to UK Members of Parliament**

Rosalynd Southern and Emily Harmer

June 2019

Online Supplement/Appendix for *Social Science Computer Review*

**Appendix A: Full Coding Schedule**

**Is this Tweet in any way uncivil or impolite? [ anywayuncivimpol ]**

Yes 1

No 0

**Does the Tweeter assign stereotypes to the MP? (e.g. associate person with a group by using labels, whether those are mild – 'snowflake', 'typical liberal' 'typical woman' or more offensive – e.g. 'mincing' 'Tories hate the poor' 'go back to the kitchen') [ stereotype ]**

Yes 1

No 0

**Does the Tweeter engage in name-calling towards the MP? [ namecalling ]**

Yes 1

No 0

**Does the Tweeter engage in vulgar language, profanity or swearing directed towards the MP? [ swearing ]**

Yes 1

No 0

**Does the Tweeter engage in silencing? (e.g. 'Stfu' 'Shut your mouth' 'stop talking' 'you shouldn't be talking about this') [ silencing ]**

Yes 1

No 0

**Does the Tweeter question the MPs Intelligence? (e.g. 'How is someone so thick an MP' 'stupid' 'dim-witted') [ intelligence ]**

Yes 1

No 0

**Does the Tweeter question the MPs Veracity? (e.g. 'This is not true', 'Lying again' 'making things up' 'bullshit') [ veracity ]**

Yes 1

No 0

**Does the Tweeter question the MPs Position? (e.g. 'Over-promoted', 'resign', 'not fit for office') [ position ]**

Yes 1

No 0

**Was violence threatened or otherwise invoked / suggested/ towards the MP? (e.g. you need a slap)**

**[ violence ]**

Yes 1

No 0

**Is this tweet gendered or sexist? (e.g. Get back to the kitchen', 'intentionally barren' 'if you had kids..' 'ask your husband' 'smile more' 'looking old' 'you dress like ...' allusions to housework etc.).**

**[ sexism ]**

No 0

Yes 1

Notes
